# Supplementary material
Source: PubMed Central journal article supplement (PMC3280496)
Supplement: 97320630007285S1.pdf [file 97320630007285S1.pdf]

## Supplementary material:

**Table 1:** Information about the two genes encoding G-6-P synthase in *R. oryzae*. 'bp' represent base pairs and 'aa' represent amino acids.

|                                         | Gene 1       | Gene 2       |
|-----------------------------------------|--------------|--------------|
| Locus                                   | RO3G_04247.3 | RO3G_14807.3 |
| Chromosome number                       | 7            | 15           |
| Nucleotide sequence (including introns) | 2357 bp      | 2358 bp      |
| Coding sequence (exons only)            | 2064 bp      | 2064 bp      |
| Translated sequence                     | 688 aa       | 688 aa       |

**Table 2:** Compilation of Glide SP and Induced fit XP docking calculations using Schrödinger-Maestro v8.5 and v9.1, respectively.

| G-6-P synthase of various organisms                     | FMDP       |             |           | ADGP       |             |           |
|---------------------------------------------------------|------------|-------------|-----------|------------|-------------|-----------|
|                                                         | Residues   | Glide Score | IFD score | Residues   | Glide Score | IFD score |
| RO3G_04247.3                                            |            |             |           | Cys 379    |             |           |
|                                                         |            |             |           | Thr 381(2) |             |           |
|                                                         | Gln 427    |             |           | Ser 382    |             |           |
|                                                         | Ser 428(2) | -8.48       | -993.94   | Val 425    | -13.97      | -1000.37  |
|                                                         | Ala 681    |             |           | Gln 427    |             |           |
| RO3G_14807.3                                            | Lys 682(2) |             |           | Ser 428    |             |           |
|                                                         |            |             |           | Val 477    |             |           |
|                                                         |            |             |           | Glu 567    |             |           |
|                                                         | Thr 381(2) |             |           | Ser 382    |             |           |
|                                                         | Ser 382(2) |             |           | Cys 379(2) |             |           |
| 1XFF- <i>E. coli</i> Glutaminase domain of G6P synthase | Gln 427(2) | -7.93       | -934.19   | Gln 427    | -13.59      | -932.45   |
|                                                         | Thr 431    |             |           | Gly 476    |             |           |
|                                                         | Val 684    |             |           | Ser 683    |             |           |
|                                                         | Cys 1      |             |           |            |             |           |
|                                                         | Arg 73     |             |           |            |             |           |
| 2BPL- <i>E. coli</i> G6P synthase                       | Trp 74     |             |           | Thr 302    |             |           |
|                                                         | Thr 76     | -9.75       | -469.44   | Gln 348    |             |           |
|                                                         | His 86     |             |           | Thr 352(2) | -13.31      | -1142.98  |
|                                                         | Gly 99     |             |           | Ser 401    |             |           |
|                                                         | Asp 123    |             |           | Glu 488    |             |           |
|                                                         |            |             | Val 605   |            |             |           |
